# Supplementary material for: Detection of resveratrol by phosphorescence quantum dots without conjunction and mutual impact exploration
Source: Royal Society of Chemistry journal article supplement (doi:10.1039/c8ra02630k), 2018-01-01
Supplement: c8ra02630k1.pdf [file c8ra02630k1.pdf]

## Supplementary information

### Figure and Table captions

**Fig.S1.** (a) TEM image of MPA-capped Mn-doped ZnS QDs; (b) XRD image of MPA-capped Mn-doped ZnS QDs; (c) The excitation (curve a) and RTP emission (curve b) spectra of Mn-doped ZnS QDs (40 mg L<sup>-1</sup>) in PBS buffer (20 mM, pH 6.4).

**Fig . S2.** (a) Effect of pH on the quenched RTP of Mn-doped ZnS QDs by RES; (b) Effect of time on the quenched RTP of Mn-doped ZnS QDs by RES; (c) Effect of NaCl concentration on the RTP emission of the Mn-doped ZnS QDs(Mn-doped ZnS QDs, 40 mg L<sup>-1</sup>)

**Table S1** Tolerance of foreign substances

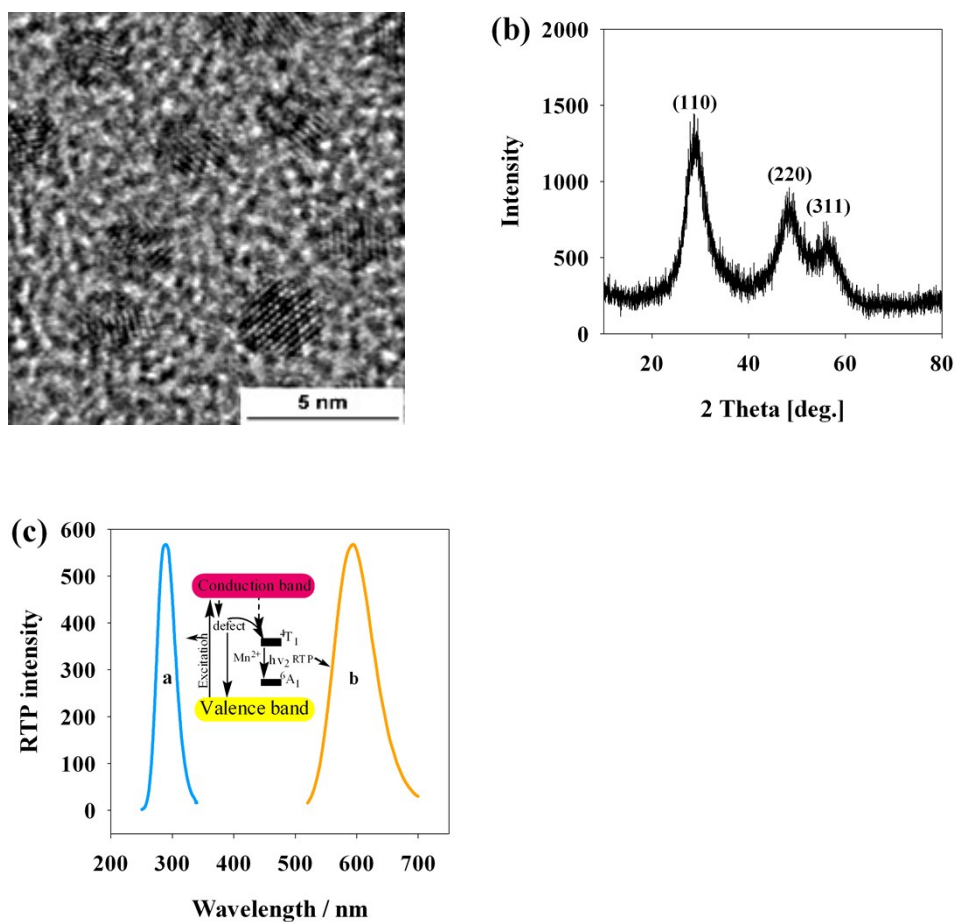

**Fig.S1.** (a) TEM image of MPA-capped Mn-doped ZnS QDs; (b) XRD image of MPA-capped Mn-doped ZnS QDs; (c) The excitation (curve a) and RTP emission (curve b) spectra of Mn-doped ZnS QDs ( $40 \text{ mg L}^{-1}$ ) in PBS buffer (20 mM, pH 6.4).

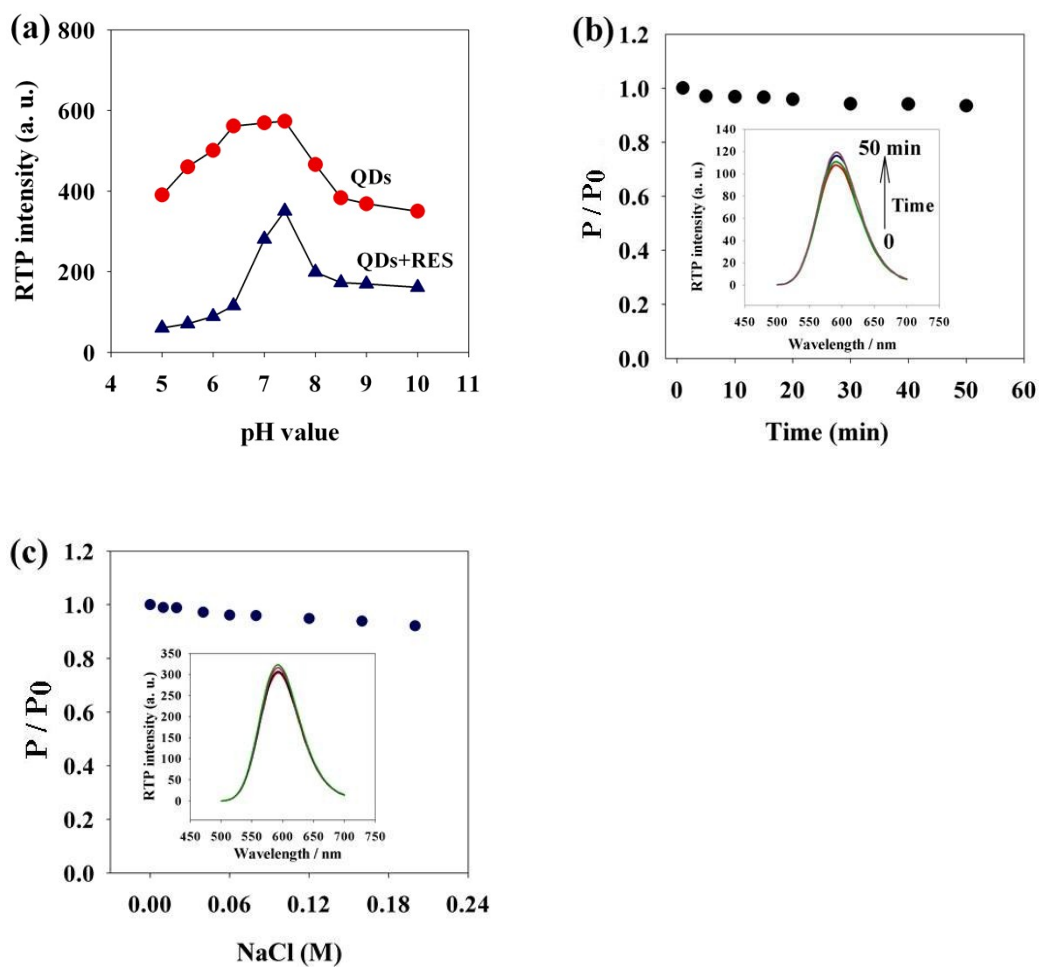

**Fig . S2.** (a) Effect of pH on the quenched RTP of Mn-doped ZnS QDs by RES; (b) Effect of time on the quenched RTP of Mn-doped ZnS QDs by RES; (c) Effect of NaCl concentration on the RTP emission of the Mn-doped ZnS QDs (Mn:ZnS QDs, 40 mg L<sup>-1</sup>)

**Table S1** Tolerance of foreign substances

| Co-existing substances        | Tolerance ratios | Change of RTP intensity (%) |
|-------------------------------|------------------|-----------------------------|
| Na <sup>+</sup>               | 10 <sup>5</sup>  | +2.4                        |
| K <sup>+</sup>                | 10 <sup>5</sup>  | -1.9                        |
| Ca <sup>2+</sup>              | 10 <sup>3</sup>  | +3.1                        |
| Mg <sup>2+</sup>              | 10 <sup>3</sup>  | +1.6                        |
| Cu <sup>2+</sup>              | 500              | +3.4                        |
| Fe <sup>3+</sup>              | 200              | -3.0                        |
| Zn <sup>2+</sup>              | 200              | -2.7                        |
| Fe <sup>2+</sup>              | 200              | -1.9                        |
| Al <sup>3+</sup>              | 100              | +2.2                        |
| Mn <sup>2+</sup>              | 100              | +3.1                        |
| NH <sup>4+</sup>              | 100              | -2.7                        |
| Ag <sup>+</sup>               | 100              | -2.0                        |
| Cl <sup>-</sup>               | 10 <sup>5</sup>  | -1.7                        |
| HCO <sub>3</sub> <sup>-</sup> | 10 <sup>3</sup>  | +3.2                        |
| Serine                        | 300              | -2.4                        |
| L-Gly                         | 400              | +2.1                        |
| L-Cys                         | 300              | -1.3                        |
| Glucose                       | 200              | +2.5                        |
| BSA                           | 100              | -3.5                        |
| Uric acid                     | 100              | -3.3                        |
